# Supplementary material for: High-efficiency ternary nonfullerene polymer solar cells with increased phase purity and reduced nonradiative energy loss
Source: Royal Society of Chemistry journal article supplement (doi:10.1039/c9ta12029g), 2019-12-14
Supplement: c9ta12029g1.pdf [file c9ta12029g1.pdf]

## Supporting Information

### High-Efficiency Ternary Nonfullerene Polymer Solar Cells with Reduced Nonradiative Energy Loss and Increased Phase Purity

*Cai'e Zhang,<sup>a,‡</sup> Pengcheng Jiang,<sup>a,‡</sup> Xiaobo Zhou,<sup>c</sup> Haiqin Liu,<sup>b</sup> Qingxin Guo,<sup>a</sup> Yahui Liu,<sup>a,\*</sup> Xinjun Xu,<sup>a</sup> Zheng Tang,<sup>b,\*</sup> Wei Ma,<sup>c,\*</sup> Zhishan Bo<sup>a,\*</sup>*

<sup>a</sup> Beijing Key Laboratory of Energy Conversion and Storage Materials, College of Chemistry, Beijing Normal University, Beijing 100875, China. E-mail: lyh1991a@163.com; zsbo@bnu.edu.cn

<sup>b</sup> Center for Advanced Low-dimension Materials, State Key Laboratory for Modification of Chemical Fibers and Polymer Materials, College of Materials Science and Engineering, Donghua University, 201620 Shanghai, China, ztang@dhu.edu.cn;

<sup>c</sup> State Key Laboratory for Mechanical Behavior of Materials, Xi'an Jiaotong University, Xi'an 710049, China. E-mail: msewma@mail.xjtu.edu.cn

Cai'e Zhang and Pengcheng Jiang contributed equally to this work.

### Experimental Section

**Materials and Instruments:** PBDB-T and IDT-EDOT were synthesized following the methods in our previous work, The ZnO solution was used to make the cathode buffer layers. PC<sub>71</sub>BM was purchased from Solarmer Materials Inc. Unless otherwise stated, all the chemicals were commercially available products and were used as received. UV-visible absorption spectra were obtained on a PerkinElmer UV-vis spectrometer model Lambda 750. Atomic force microscopy (AFM) measurements were performed under ambient conditions using a Digital Instrument Multimode Nanoscope IIIA in the tapping mode. Transmission electron microscopy (TEM) images were obtained with a FEI Technai TF20 (Philip) transmission electron microscopy. The thickness of the blend films was determined by a Dektak 6 M surface profilometer.

**Fabrication and Characterization of PSCs:** The device architecture was ITO/ZnO (30 nm)/active layer (100 nm)/MoO<sub>3</sub> (85 Å)/Ag (100 nm) for solar cells. Precleaned ITO substrates were treated by UV-ozone for 30 min. A thin layer of ZnO was spin-

coated on top of the precleaned ITO substrates at 3500 rpm for 15 s and annealed at 200 °C for 20 min on a hotplate before being transferred into a glove box. The binary and ternary blend films keep the same optimal donor/receptor weight ratio of 1:1.2 (the two acceptors were mixed with different ratios to fabricate the ternary PSCs) with polymer concentration of 5 mg/mL in the 1,2-dichlorobenzene solution (without any additives), then spin-coated at 1500 rpm for 40 s to obtain a film thickness of 100 nm on the top of ITO/ZnO layer. Finally, to complete the devices, the top electrode was thermally evaporated with an 8.5 nm MoO<sub>3</sub> layer and followed by a 100 nm Ag film at a vacuum pressure below 10<sup>-7</sup> Torr. Cells were fabricated on the substrate with an effective area of 0.04 cm<sup>2</sup>. The measurement of the devices was conducted in a glove box without encapsulation. The temperature while measuring the  $J-V$  curves was approximately 25 °C. The characteristics of the solar cells were statistically analysed by testing over 6 cells.  $J_{sc}$  values integrated from the EQE curves agreed well with those obtained from  $J-V$  tests (within 5% mismatch). The  $J-V$  curves were measured under AM 1.5G illumination at 100 mW cm<sup>-2</sup> using a class AAA solar simulator (XES-70S1, SAN-EI Electric Co., Ltd) calibrated with a standard photovoltaic cell equipped with a KG5 filter (certificated by the National Institute of Metrology) and a Keithley 2400 source-measure unit. The EQE data were obtained using a solar cell spectral response measurement system (QER3011, Enli Technology Co. Ltd), and the intensity was calibrated with a standard single-crystal Si photovoltaic cell.

*Grazing Incidence Wide-Angle X-ray Scattering (GIWAXS) Characterization:*

GIWAXS measurements were performed at beamline 7.3.3 at the Advanced Light Source. Samples were prepared on Si substrates using identical blend solutions as those used in devices. The 10 keV X-ray beam was incident at a grazing angle of 0.12°-0.16°, selected to maximize the scattering intensity from the samples. The scattered x-rays were detected using a Dectris Pilatus 2M photon counting detector.

*Resonant Soft X-ray Scattering (RSoXS):* RSoXS transmission measurements were

performed at beamline 11.0.1.2 at the Advanced Light Source (ALS). Samples for R-SoXS measurements were prepared on a PSS modified Si substrate under the same conditions as those used for device fabrication, and then transferred by floating in water to a 1.5 mm × 1.5 mm, 100 nm thick Si<sub>3</sub>N<sub>4</sub> membrane supported by a 5 mm × 5 mm, 200 μm thick Si frame (Norcada Inc.). 2-D scattering patterns were collected on an in-vacuum CCD camera (Princeton Instrument PI-MTE). The sample detector distance was calibrated from diffraction peaks of a triblock copolymer poly(isoprene-b-styrene-b-2-vinyl pyridine), which has a known spacing of 391 Å. The beam size at the sample is approximately 100 μm by 200 μm.

### Charge Mobility Measurements:

Space-charge-limited-current (SCLC) measurements were carried out using a Keithley 236 source/measure unit. Electron-only devices were constructed in the architecture ITO/ZnO/active layer/Al, while hole-only devices were constructed in the architecture ITO/PEDOT:PSS/active layer/Ag. A numerical solver was used fit the data using the drift-diffusion model. Trap densities, characteristic trap energies, mobility and injection barriers were allowed to vary. Active layer thicknesses were measured using a Dektak profilometer, and were found to be 100 nm for PBDB-T:IDT-EDOT, PBDB-T:IDT-EDOT:PC<sub>71</sub>BM and PBDB-T:PC<sub>71</sub>BM for electron-only and hole-only measurements.

**Table S1** Photovoltaic parameters of the OSCs with PBDB-T:IDT-EDOT=1:0.5/1:0.8/1:1.2/1:1.5/1:2.

| PBDB-T:IDT-EDOT | $V_{oc}$ (V) | $J_{sc}$ (mA/cm <sup>2</sup> ) | FF(%) | PCE (%) |
|-----------------|--------------|--------------------------------|-------|---------|
| 1:0.5           | 0.91         | 15.12                          | 50.95 | 7.02    |
| 1:0.8           | 0.89         | 15.80                          | 56.54 | 8.01    |

|       |      |       |       |      |
|-------|------|-------|-------|------|
| 1:1.2 | 0.87 | 18.42 | 62.34 | 9.93 |
| 1:1.5 | 0.87 | 18.91 | 58.74 | 9.67 |
| 1:2   | 0.87 | 17.73 | 56.82 | 8.75 |

**Table S2** Photovoltaic parameter of PBDB-T:IDT-EDOT:PC<sub>71</sub>BM=1:0.6:0.6 based devices with DIO additives.

| Additive (DIO%) | $V_{oc}$ (V) | $J_{sc}$ (mA/cm <sup>2</sup> ) | FF(%) | PCE (%) |
|-----------------|--------------|--------------------------------|-------|---------|
| 0.1             | 0.86         | 19.55                          | 62.33 | 10.60   |
| 0.2             | 0.87         | 19.00                          | 66.80 | 11.08   |
| 0.3             | 0.86         | 19.66                          | 62.15 | 10.51   |
| 0.4             | 0.87         | 18.74                          | 63.56 | 10.36   |
| 0.5             | 0.85         | 18.33                          | 51.87 | 8.10    |

**Table S3** Photovoltaic parameter of PBDB-T:IDT-EDOT:PC<sub>71</sub>BM=1:0.6:0.6 based devices with o-chlorobenzaldehyde (CBA) additives.

| Additive (CBA%) | $V_{oc}$ (V) | $J_{sc}$ (mA/cm <sup>2</sup> ) | FF(%) | PCE (%) |
|-----------------|--------------|--------------------------------|-------|---------|
| 0.1             | 0.86         | 18.60                          | 59.45 | 9.53    |
| 0.2             | 0.86         | 20.73                          | 65.46 | 11.72   |
| 0.3             | 0.86         | 20.13                          | 66.48 | 11.48   |
| 0.4             | 0.86         | 19.65                          | 65.32 | 11.10   |
| 0.5             | 0.86         | 19.36                          | 64.82 | 10.82   |

**Table S4** The photovoltaic parameters of the PBDB-T:IDT-EDOT:PC<sub>71</sub>BM=1:0.6:0.6 based devices with different active-layer rotate speed.

| rotate speed | $V_{oc}$ (V) | $J_{sc}$ (mA/cm <sup>2</sup> ) | FF(%) | PCE (%) |
|--------------|--------------|--------------------------------|-------|---------|
| 900          | 0.85         | 18.44                          | 60.08 | 9.45    |
| 1100         | 0.85         | 19.40                          | 63.17 | 10.53   |
| 1300         | 0.86         | 20.09                          | 64.69 | 11.23   |
| 1500         | 0.88         | 20.84                          | 66.7  | 12.07   |

|      |      |       |       |       |
|------|------|-------|-------|-------|
| 1700 | 0.87 | 20.18 | 65.01 | 11.36 |
| 1900 | 0.86 | 19.80 | 65.49 | 11.20 |
| 2100 | 0.86 | 19.75 | 66.20 | 11.36 |
| 2300 | 0.87 | 19.73 | 65.63 | 11.29 |
| 2500 | 0.87 | 18.51 | 66.37 | 10.65 |

**Table S5.** Photovoltaic parameters of the OSCs with different weight ratio of PC<sub>61</sub>BM.

| PBDB-T:A1:A2 | $V_{oc}$ (V) | $J_{sc}$ (mA cm <sup>-2</sup> ) | FF (%) | PCE (%) |
|--------------|--------------|---------------------------------|--------|---------|
| 1:1.2:0      | 0.87         | 18.42                           | 62.34  | 9.93    |
| 1:1:0.2      | 0.89         | 17.35                           | 59.54  | 9.22    |
| 1:0.8:0.4    | 0.89         | 17.20                           | 58.78  | 9.07    |
| 1:0.6:0.6    | 0.90         | 16.55                           | 61.23  | 9.12    |
| 1:0.4:0.8    | 0.91         | 15.63                           | 60.18  | 8.53    |
| 1:0.2:1      | 0.91         | 14.21                           | 63.79  | 8.23    |
| 1:0:1.2      | 0.88         | 10.88                           | 67.34  | 6.50    |

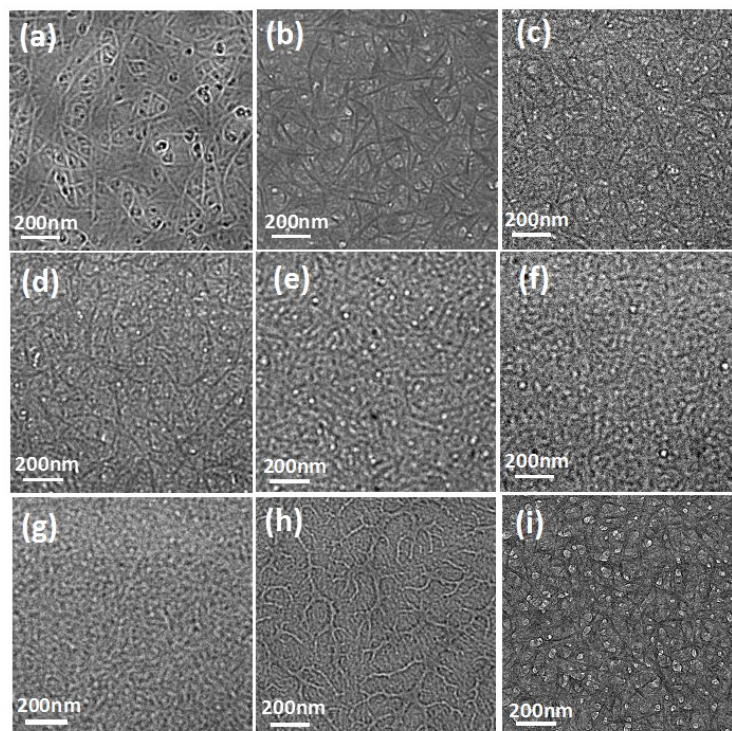

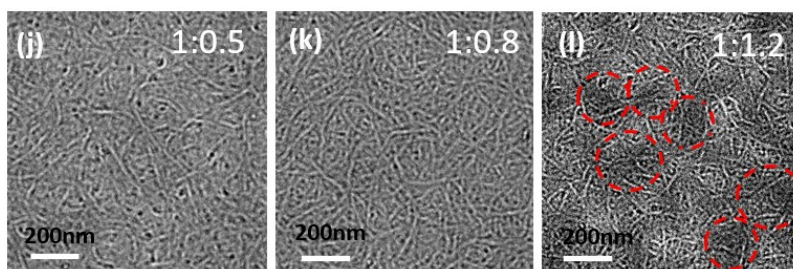

**Fig. S1** (a)-(g) TEM images of the devices in D/A ratio of 1:1.2 (w/w) with different proportions of PC<sub>71</sub>BM; (h) the pristine PBDB-T film; (i) the bottom panels of PBDB-T:IDT-EDOT blend film by washing with dichloromethane, (j)-(m) (f) blend film with PBDB-T:IDT-EDOT=1:0.2/1:0.5/1:0.8/1:1.2, respectively.

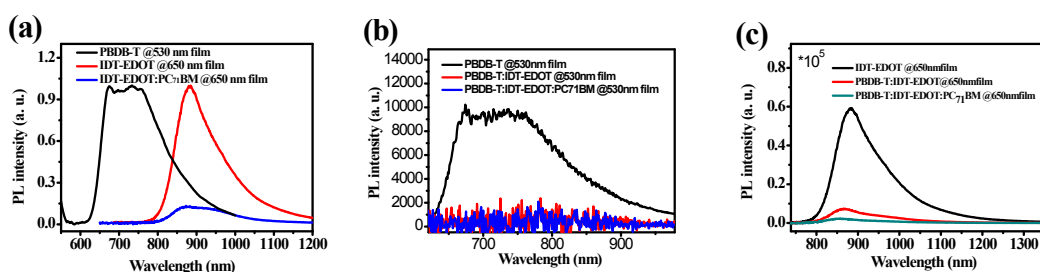

**Fig. S2** (a) PL spectra of the neat PBDB-T and IDT-EDOT films and the IDT-EDOT:PC<sub>71</sub>BM blend film. (b) and (c) Photoluminescence spectra of neat acceptor IDT-EDOT and blend film PBDB-T:IDT-EDOT and PBDB-T:IDT-EDOT:PC<sub>71</sub>BM excitation at 530 nm and excitation at 650 nm.

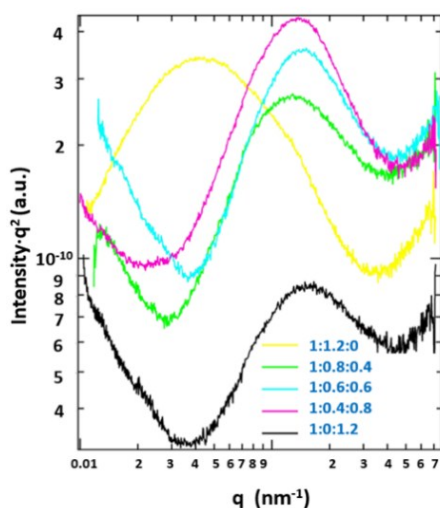

**Fig. S3** R-SoXS profiles of blend films based on PBDB-T:IDT-EDOT:PC<sub>71</sub>BM with different ratios of IDT-EDOT:PC<sub>71</sub>BM.

**Table S6** Summary of the crystal coherence length of neat polymer films

| PBDB-T:IDT-EDOT:PC <sub>71</sub> BM | d-spacing(100) | FWHM  | CCL (nm) |
|-------------------------------------|----------------|-------|----------|
| 1:1.2:0                             | 21.53          | 0.034 | 16.76    |
| 1:1:0.2:                            | 21.47          | 0.038 | 14.90    |
| 1:0.8:0.4                           | 21.47          | 0.035 | 15.93    |
| 1:0.6:0.6                           | 21.39          | 0.036 | 15.51    |
| 1:0.4:0.8                           | 21.30          | 0.037 | 15.40    |
| 1:0.2:1                             | 21.01          | 0.041 | 13.69    |
| 1:0:1.2                             | 20.75          | 0.040 | 14.15    |
| 1:0:0                               | 21.37          | 0.049 | 11.45    |
| 0:1:0                               | 19.93          | 0.035 | 16.23    |

**Table S7** Summary of the domain size and domain purity

| PBDB-T:IDT-EDOT:PC <sub>71</sub> BM | domain size (Å) | domain purity |
|-------------------------------------|-----------------|---------------|
| 1:1.2:0                             | 74.41           | 0.77          |
| 1:0.8:0.4                           | 24.19           | 0.90          |
| 1:0.6:0.6                           | 21.63           | 1.00          |
| 1:0.4:0.8                           | 23.54           | 1.00          |
| 1:0:1.2                             | 20.27           | 0.52          |

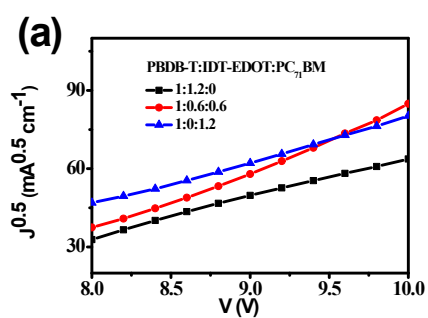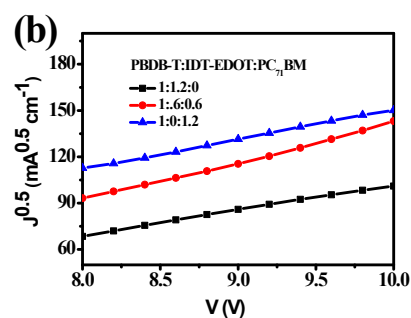

**Fig S4** SCLC method for determine electron and hole mobilities based on electron-only (a) and hole-only (b) devices using PBDB-T:IDT-EDOT:PC<sub>71</sub>BM as the active layer with various IDT-EDOT:PC<sub>71</sub>BM ratios.

**Table S8** Hole and electron mobilities of devices.

| PBDB-T:IDT-EDOT:PC <sub>71</sub> BM | $\mu_e$ [cm <sup>2</sup> V <sup>-1</sup> s <sup>-1</sup> ] | $\mu_h$ [cm <sup>2</sup> V <sup>-1</sup> s <sup>-1</sup> ] | $\mu_h/\mu_e$ |
|-------------------------------------|------------------------------------------------------------|------------------------------------------------------------|---------------|
| 1:1.2:0                             | $7.77 \times 10^{-5}$                                      | $9.00 \times 10^{-5}$                                      | 1.16          |
| 1:0.6:0.6                           | $1.18 \times 10^{-4}$                                      | $2.05 \times 10^{-4}$                                      | 1.06          |
| 1:0:1.2                             | $9.46 \times 10^{-5}$                                      | $1.25 \times 10^{-4}$                                      | 1.32          |
